# Supplementary material for: Exploring the interaction of decavanadate with methylene blue, toluidine blue and rhodamine B
Source: Royal Society of Chemistry journal article supplement (doi:10.1039/d4nj02454k), 2024-01-01
Supplement: d4nj02454k1.pdf [file d4nj02454k1.pdf]

## Supplementary information

### Exploring the interaction of decavanadate with methylene blue, toluidine blue and rhodamine B

Juliana M. Missina<sup>1\*</sup>, Heloísa de S. Camilo<sup>1</sup>, Rúbia C. R. Bottini<sup>1</sup>, Isabela Passadore de Souza e Silva<sup>1</sup>, Lucas G. Fachini<sup>1</sup>, Patrizia Rossi<sup>2</sup>, Paola Paoli<sup>2</sup>, Eduardo L. de Sá<sup>1</sup> and Giovana G. Nunes<sup>1\*</sup>

<sup>1</sup>*Departamento de Química, Universidade Federal do Paraná, Curitiba-PR, Brazil*

<sup>2</sup>*Dipartimento di Ingegneria Industriale, Università degli Studi di Firenze, Firenze, Italy*

| CONTENTS           |                                                                                                                                                                                                                                                                                               | page      |
|--------------------|-----------------------------------------------------------------------------------------------------------------------------------------------------------------------------------------------------------------------------------------------------------------------------------------------|-----------|
| <b>Table S1.</b>   | Bond lengths (Å) and angles (°) for the V <sub>10</sub> anion in <b>2,3-ampV<sub>10</sub></b> and <b>MBV<sub>10</sub></b>                                                                                                                                                                     | <b>2</b>  |
| <b>Table S2.</b>   | Decavanadate salts containing aminopyridines as counterions found in the CCDC database                                                                                                                                                                                                        | <b>4</b>  |
| <b>Table S3.</b>   | Tentative assignments for the IR spectrum of (2,3-ampH) <sub>6</sub> [V <sub>10</sub> O <sub>28</sub> ]·4H <sub>2</sub> O ( <b>2,3-ampV<sub>10</sub></b> )                                                                                                                                    | <b>4</b>  |
| <b>Table S4.</b>   | Tentative assignments for the IR spectra registered for <b>MBV<sub>10</sub></b> and <b>TBV<sub>10</sub></b>                                                                                                                                                                                   | <b>5</b>  |
| <b>Table S5.</b>   | Final discoloration values of MB solution at 10.0 mg L <sup>-1</sup> and TB at 10.0 mg L <sup>-1</sup> bleached by <b>2,3-ampV<sub>10</sub></b>                                                                                                                                               | <b>5</b>  |
| <b>Figure S1.</b>  | Calculated and experimental PXRD patterns of <b>2,3-ampV<sub>10</sub></b> .                                                                                                                                                                                                                   | <b>6</b>  |
| <b>Figure S2.</b>  | <b>A)</b> ORTEP view of the asymmetric unit of <b>2,3-ampV<sub>10</sub></b> . <b>B)</b> Chain formed by the 2,3-ampH <sup>+</sup> cation and V <sub>10</sub> anions interactions in <b>2,3-ampV<sub>10</sub></b> . <b>C)</b> 2,3-ampH <sup>+</sup> cation and V <sub>10</sub> anions network. | <b>7</b>  |
| <b>Figure S3.</b>  | Calculated and experimental PXRD patterns of <b>MBV<sub>10</sub></b> .                                                                                                                                                                                                                        | <b>8</b>  |
| <b>Figure S4.</b>  | PXRD pattern of <b>ATV<sub>10</sub></b> .                                                                                                                                                                                                                                                     | <b>8</b>  |
| <b>Figure S5.</b>  | IR spectrum of (2,3-ampH) <sub>6</sub> [V <sub>10</sub> O <sub>28</sub> ]·4H <sub>2</sub> O ( <b>2,3-ampV<sub>10</sub></b> ).                                                                                                                                                                 | <b>9</b>  |
| <b>Figure S6.</b>  | IR spectrum recorded for the solids isolated from MB bleaching reactions with <b>2,3-ampV<sub>10</sub></b> .                                                                                                                                                                                  | <b>9</b>  |
| <b>Figure S7.</b>  | IR spectrum recorded for the solids isolated from TB bleaching reactions with <b>2,3-ampV<sub>10</sub></b> .                                                                                                                                                                                  | <b>10</b> |
| <b>Figure S8.</b>  | ORTEP view of the asymmetric unit of <b>MBV<sub>10</sub></b> . Ellipsoid probability 30%.                                                                                                                                                                                                     | <b>10</b> |
| <b>Figure S9.</b>  | Electronic spectra registered for the supernatants of the bleaching reactions using 10 mg of <b>2,3-ampV<sub>10</sub></b> in 10 mg L <sup>-1</sup> aqueous solution of RB in time.                                                                                                            | <b>11</b> |
| <b>Figure S10.</b> | ESI-MS scan of MB in positive mode: A) before and B) after the reaction with 10 mg of 2,3-ampV <sub>10</sub> .                                                                                                                                                                                | <b>12</b> |
| <b>Figure S11.</b> | ESI-MS scan of TB (10 mg L <sup>-1</sup> ) in positive mode: A) before and B) after the reaction with 10 mg 2,3-ampV <sub>10</sub> .                                                                                                                                                          | <b>13</b> |
| <b>Figure S12.</b> | ESI-MS scan of 2-amino-3-methylpyridine in methanol in positive mode.                                                                                                                                                                                                                         | <b>14</b> |

**Table S1.** Bond lengths (Å) and angles (°) for the V<sub>10</sub> anion in **2,3-ampV<sub>10</sub>** and **MBV<sub>10</sub>**

|                   | <b>2,3-ampV<sub>10</sub></b> | <b>MBV<sub>10</sub></b> |
|-------------------|------------------------------|-------------------------|
| <i>Bonds (Å)</i>  |                              |                         |
| V1-O1             | 1.609(3)                     | 1.595(6)                |
| V1-O2             | 1.901(2)                     | 2.048(5)                |
| V1-O3             | 2.064(2)                     | 1.846(6)                |
| V1-O4             | 1.864(2)                     | 1.827(6)                |
| V1-O5             | 1.799(2)                     | 1.910(6)                |
| V1-O14            | 2.345(2)                     | 2.330(5)                |
| V2-O2             | 1.784(2)                     | 1.684(5)                |
| V2-O6             | 1.616(2)                     | 1.676(5)                |
| V2-O7             | 1.972(2)                     | 2.009(6)                |
| V2-O13            | 1.860(2)                     | 1.894(6)                |
| V2-O14            | 2.236(2)                     | 2.106(5)                |
| V3-O3             | 1.683(2)                     | 1.845(6)                |
| V3-O7             | 1.926(2)                     | 2.057(5)                |
| V3-O8             | 1.687(2)                     | 1.597(6)                |
| V3-O9             | 1.942(2)                     | 1.789(6)                |
| V3-O14            | 2.098(2)                     | 2.273(6)                |
| V4-O4             | 1.807(2)                     | 1.833(6)                |
| V4-O9             | 1.979(2)                     | 1.879(6)                |
| V4-O10            | 1.615(2)                     | 1.604(5)                |
| V4-O11            | 1.843(2)                     | 1.892(6)                |
| V4-O14            | 2.239(2)                     | 2.322(5)                |
| V5-O5             | 1.846(2)                     | 1.763(5)                |
| V5-O11            | 1.870(2)                     | 1.882(5)                |
| V5-O12            | 1.616(2)                     | 1.595(7)                |
| V5-O13            | 1.859(2)                     | 1.966(5)                |
| V5-O14            | 2.294(2)                     | 2.274(6)                |
| <i>Angles (°)</i> |                              |                         |

|            |           |          |
|------------|-----------|----------|
| O1-V1-O2   | 101.7(2)  | 100.0(3) |
| O1-V1-O3   | 100.2(1)  | 102.3(3) |
| O1-V1-O4   | 102.5(1)  | 104.5(3) |
| O1-V1-O5   | 105.3(1)  | 101.5(3) |
| O1-V1-O14  | 173.2(1)  | 173.2(2) |
| O2-V1-O3   | 81.75(9)  | 84.2(2)  |
| O2-V1-O4   | 153.2(1)  | 155.4(2) |
| O2-V1-O5   | 91.8(1)   | 82.3(2)  |
| O2-V1-O14  | 76.95(9)  | 73.4(2)  |
| O3-V1-O4   | 82.72(9)  | 93.1(2)  |
| O3-V1-O5   | 154.5(1)  | 154.4(3) |
| O3-V1-O14  | 73.01(8)  | 78.6(2)  |
| O4-V1-O5   | 92.9(1)   | 90.2(3)  |
| O4-V1-O14  | 77.67(9)  | 82.1(2)  |
| O5-V1-O14  | 81.47(9)  | 76.8(2)  |
| O2-V2-O6   | 102.7(1)  | 106.6(3) |
| O2-V2-O7   | 92.8(1)   | 94.2(3)  |
| O2-V2-O13  | 95.4(1)   | 99.4(3)  |
| O2-V2-O14  | 82.20(9)  | 86.9(2)  |
| O6-V2-O7   | 100.8(1)  | 95.2(3)  |
| O6-V2-O13  | 101.7(1)  | 99.0(3)  |
| O6-V2-O14  | 174.8(1)  | 165.9(2) |
| O7-V2-O13  | 153.7(1)  | 156.6(2) |
| O7-V2-O14  | 76.95(8)  | 79.8(2)  |
| O13-V2-O14 | 79.49(9)  | 82.0(2)  |
| O3-V3-O7   | 97.2(1)   | 87.9(2)  |
| O3-V3-O8   | 106.7(1)  | 102.2(3) |
| O3-V3-O9   | 97.7(1)   | 95.7(2)  |
| O3-V3-O14  | 87.55(9)  | 80.1(2)  |
| O7-V3-O8   | 97.0(1)   | 99.3(3)  |
| O7-V3-O9   | 156.48(9) | 154.7(2) |

|            |           |          |
|------------|-----------|----------|
| O7-V3-O14  | 81.34(9)  | 75.0(2)  |
| O8-V3-O9   | 96.0(1)   | 104.3(3) |
| O8-V3-O14  | 165.71(9) | 173.8(3) |
| O9-V3-O14  | 81.24(9)  | 81.0(2)  |
| O4-V4-O9   | 91.31(9)  | 91.6(3)  |
| O4-V4-O10  | 101.9(1)  | 104.1(3) |
| O4-V4-O11  | 95.5(1)   | 91.5(3)  |
| O4-V4-O14  | 81.66(9)  | 82.2(2)  |
| O9-V4-O10  | 100.1(1)  | 102.3(3) |
| O9-V4-O11  | 154.6(1)  | 154.9(3) |
| O9-V4-O14  | 76.98(8)  | 77.9(2)  |
| O10-V4-O11 | 102.4(1)  | 101.1(3) |
| O10-V4-O14 | 175.5(1)  | 173.6(3) |
| O11-V4-O14 | 79.80(9)  | 77.9(2)  |
| O5-V5-O11  | 90.4(1)   | 95.5(3)  |
| O5-V5-O12  | 103.4(1)  | 105.0(3) |
| O5-V5-O13  | 91.7(1)   | 93.3(2)  |
| O5-V5-O14  | 81.96(9)  | 81.1(2)  |
| O11-V5-O12 | 101.9(1)  | 102.5(3) |
| O11-V5-O13 | 155.2(1)  | 152.4(2) |
| O11-V5-O14 | 77.81(9)  | 79.3(2)  |
| O12-V5-O13 | 101.7(1)  | 100.4(3) |
| O12-V5-O14 | 174.6(1)  | 173.3(3) |
| O13-V5-O14 | 77.97(9)  | 76.3(2)  |

---

**Table S2.** Decavanadate salts containing aminopyridines as counterions found in the CCDC database

| Organic part              | Formulation                                                                                                                                              | CCDC#<br>refcode                  | Ref. |
|---------------------------|----------------------------------------------------------------------------------------------------------------------------------------------------------|-----------------------------------|------|
| 2-aminopyridine           | [2-ampH] <sub>6</sub> [V <sub>10</sub> O <sub>28</sub> ]·2H <sub>2</sub> O                                                                               | DEFPIO,<br>DEFPIO01,<br>DEFPIO02, | 1-3  |
|                           | [[Cu(2-amp) <sub>2</sub> (H <sub>2</sub> O)] <sub>2</sub> H <sub>2</sub> V <sub>10</sub> O <sub>28</sub> ]·4H <sub>2</sub> O                             | FASBEI                            | 4    |
| 3-aminopyridine           | [[Co(3-amp)(H <sub>2</sub> O) <sub>5</sub> ]] <sub>2</sub> [3-ampH] <sub>2</sub> [V <sub>10</sub> O <sub>28</sub> ]·6H <sub>2</sub> O                    | SUDGEG                            | 5    |
|                           | [3-ampH] <sub>6</sub> [V <sub>10</sub> O <sub>28</sub> ]·2H <sub>2</sub> O                                                                               | AROYOW                            | 6    |
| 4-aminopyridine           | [4-dmampH] <sub>4</sub> [H <sub>2</sub> V <sub>10</sub> O <sub>28</sub> ]·5H <sub>2</sub> O*                                                             | ROSYEG                            | 7    |
|                           | [4-ampH] <sub>10</sub> [[Na(H <sub>2</sub> O) <sub>6</sub> ]{HV <sub>10</sub> O <sub>28</sub> }] [V <sub>10</sub> O <sub>28</sub> ]·15H <sub>2</sub> O   | SUDGIK                            | 5    |
|                           | [[4-ampH] <sub>6</sub> {Co(H <sub>2</sub> O) <sub>6</sub> }] <sub>3</sub> [V <sub>10</sub> O <sub>28</sub> ] <sub>2</sub> ·14H <sub>2</sub> O            | SUDGOQ                            | 5    |
|                           | [[4-ampH] <sub>10</sub> {Zn(H <sub>2</sub> O) <sub>6</sub> }] [V <sub>10</sub> O <sub>28</sub> ] <sub>2</sub> ·10H <sub>2</sub> O                        | SUDGUW                            | 5    |
|                           | [4-dmampH] <sub>6</sub> [V <sub>10</sub> O <sub>28</sub> ]·16H <sub>2</sub> O                                                                            | ZADHUK,<br>ZADHUK01               | 8, 9 |
| 4-dimethylaminopyridinium | [4-dmampH] <sub>6</sub> [V <sub>10</sub> O <sub>28</sub> ]·H <sub>2</sub> O                                                                              | XEHZIW                            | 9    |
|                           | [4-dmampH] <sub>4</sub> (NH <sub>4</sub> ) <sub>2</sub> [V <sub>10</sub> O <sub>28</sub> ]·8H <sub>2</sub> O                                             | WULQIF                            | 10   |
|                           | [[C <sub>7</sub> H <sub>11</sub> N <sub>2</sub> ] <sub>4</sub> ][Mg(H <sub>2</sub> O) <sub>6</sub> ][O <sub>28</sub> V <sub>10</sub> ]·4H <sub>2</sub> O | LOPGOQ                            | 11   |

\*dmampH = dimethylaminopyridinium cation

# CCDC = Cambridge Crystallographic Data Centre

**Table S3.** Tentative assignments for the infrared absorption spectrum (cm<sup>-1</sup>) of (2,3-ampH)<sub>6</sub>[V<sub>10</sub>O<sub>28</sub>]·4H<sub>2</sub>O (**2,3-ampV<sub>10</sub>**)<sup>12, 13</sup>

| Tentative assignments                                                                         | <b>2,3-ampV<sub>10</sub></b> |
|-----------------------------------------------------------------------------------------------|------------------------------|
| $\nu(\text{O-H})$ and $\nu(\text{N-H})$                                                       | 3551, 3356 and 3176          |
| $\nu(\text{C-C})_{\text{ring}}$ , $\delta(\text{N-H})$ or $\delta(\text{O-H})_{\text{water}}$ | 1653                         |
| $\nu(\text{C-C})_{\text{ring}}$ and $\delta(\text{N-H})$                                      | 1566                         |
| $\delta(\text{CH}_3)$                                                                         | 1470, 1387, 1362 and 1304    |
| $\nu(\text{C=N})$                                                                             | 1252                         |
| $\nu(\text{V=O})$                                                                             | 947                          |
| $\nu_{\text{as}}(\text{V-O})$ , $\nu_{\text{sym}}(\text{V-O})$ and $\delta(\text{C-H})$       | 839 and 737                  |
| $\delta(\text{V-O-V})$                                                                        | 594 and 453                  |
| $\delta(\text{C-N-C})$                                                                        | 538                          |

ν = stretching, ν<sub>as</sub> = asymmetric stretching, ν<sub>sym</sub> = symmetric stretching, and δ = in- or out-of-plane bending

**Table S4.** Tentative assignments for the IR (cm<sup>-1</sup>) spectra registered for **MBV<sub>10</sub>** and **TBV<sub>10</sub>**<sup>14-17</sup>

| Assignment                                                       | MBV <sub>10</sub>            | TBV <sub>10</sub> |
|------------------------------------------------------------------|------------------------------|-------------------|
| $\nu(\text{O-H})$ and $\nu(\text{N-H})$                          | 3450 and 3348                | 3314 and 3188     |
| $\delta(\text{N-H})$                                             | -                            | 1599              |
| $\nu(\text{C=N}), \nu(\text{C-C})$                               | 1599, 1221                   | 1649              |
| $\nu(\text{C=S}^+)$                                              | 1489                         | 1486              |
| $\delta(\text{C-H})$                                             | 1441, 1392, 1252 and<br>1178 | 1323, 1487        |
| $\delta(\text{C-N})$                                             | 1153                         | 1385              |
| $\nu(\text{C-S-C})$                                              | 1040                         | 1025              |
| $\nu(\text{V=O})$                                                | 964                          | 959               |
| $\nu_{\text{as}}(\text{V-O})$ and $\nu_{\text{sim}}(\text{V-O})$ | 831 and 760                  | 827 and 744       |
| $\delta(\text{V-O-V})$                                           | 607                          | 663               |

$\nu$  = stretching,  $\nu_{\text{as}}$  = asymmetric stretching,  $\nu_{\text{sim}}$  = symmetric stretching e  $\delta$  = in-plane angular deformation

**Table S5.** Final discoloration values of MB solution at 10.0 mg L<sup>-1</sup> and TB at 10.0 mg L<sup>-1</sup> bleached by **2,3-ampV<sub>10</sub>** represented by arithmetic mean (%)  $\pm$  standard deviation (SD) in the different reaction conditions

| Reaction condition                                                                                   | Reaction time (min) | MB* bleaching (%) $\pm$ SD | TB* bleaching (%) $\pm$ SD |
|------------------------------------------------------------------------------------------------------|---------------------|----------------------------|----------------------------|
| <i>General investigation (pH 6)</i>                                                                  |                     |                            |                            |
| 10.0 mg of <b>2,3-AmpV<sub>10</sub></b> + AM <sub>(aq)</sub> a 10.0 mg L <sup>-1</sup>               | 15                  | 89.88 $\pm$ 0.57           | 70.27 $\pm$ 0.79           |
| <i>Effect of 2,3-AmpV<sub>10</sub> amount (pH 6)</i>                                                 |                     |                            |                            |
| 16 mg of <b>2,3-AmpV<sub>10</sub></b> + dye solution                                                 | 15                  | NA                         | 77.28 $\pm$ 1.17           |
| 4.0 mg of <b>2,3-AmpV<sub>10</sub></b> + dye solution                                                | 15                  | 86.54 $\pm$ 1.48           | 49.50 $\pm$ 4.46           |
| 2.0 mg of <b>2,3-AmpV<sub>10</sub></b> + dye solution                                                | 15                  | 82.67 $\pm$ 0.24           | NA                         |
| 1.0 mg of <b>2,3-AmpV<sub>10</sub></b> + dye solution                                                | 15                  | 32.10 $\pm$ 2.05           | NA                         |
| <i>Presence of peroxide</i>                                                                          |                     |                            |                            |
| 10.0 mg of <b>2,3-AmpV<sub>10</sub></b> + dye solution + 1.0 mL de H <sub>2</sub> O <sub>2</sub> 35% | 10                  | 90.50 $\pm$ 0.64           | NA                         |
| <i>pH 3</i>                                                                                          |                     |                            |                            |
| 10.0 mg of <b>2,3-AmpV<sub>10</sub></b> + dye solution, pH 3                                         | 15                  | 93.18 $\pm$ 0.73           | 83.57 $\pm$ 1.10           |

NA = Data not available,

\* monitored absorption wavelength for MB = 664 nm and for TB = 630 nm

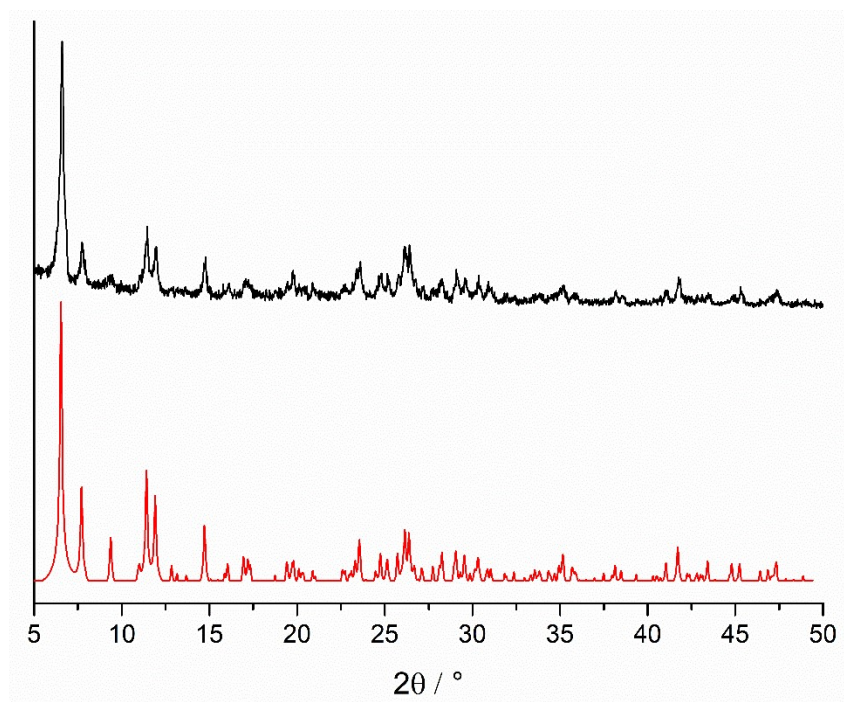

**Figure S1.** Calculated (red line) and experimental (black line) PXR D patterns of **2,3-ampV<sub>10</sub>**. Main peaks in the experimental diffractogram are located at 6.6, 7.7, 11.5, 12.0, 14.8, 17.2, 19.7, 23.6, 24.8, 26.1, 28.2, 29.1 and 30.3° 2θ.

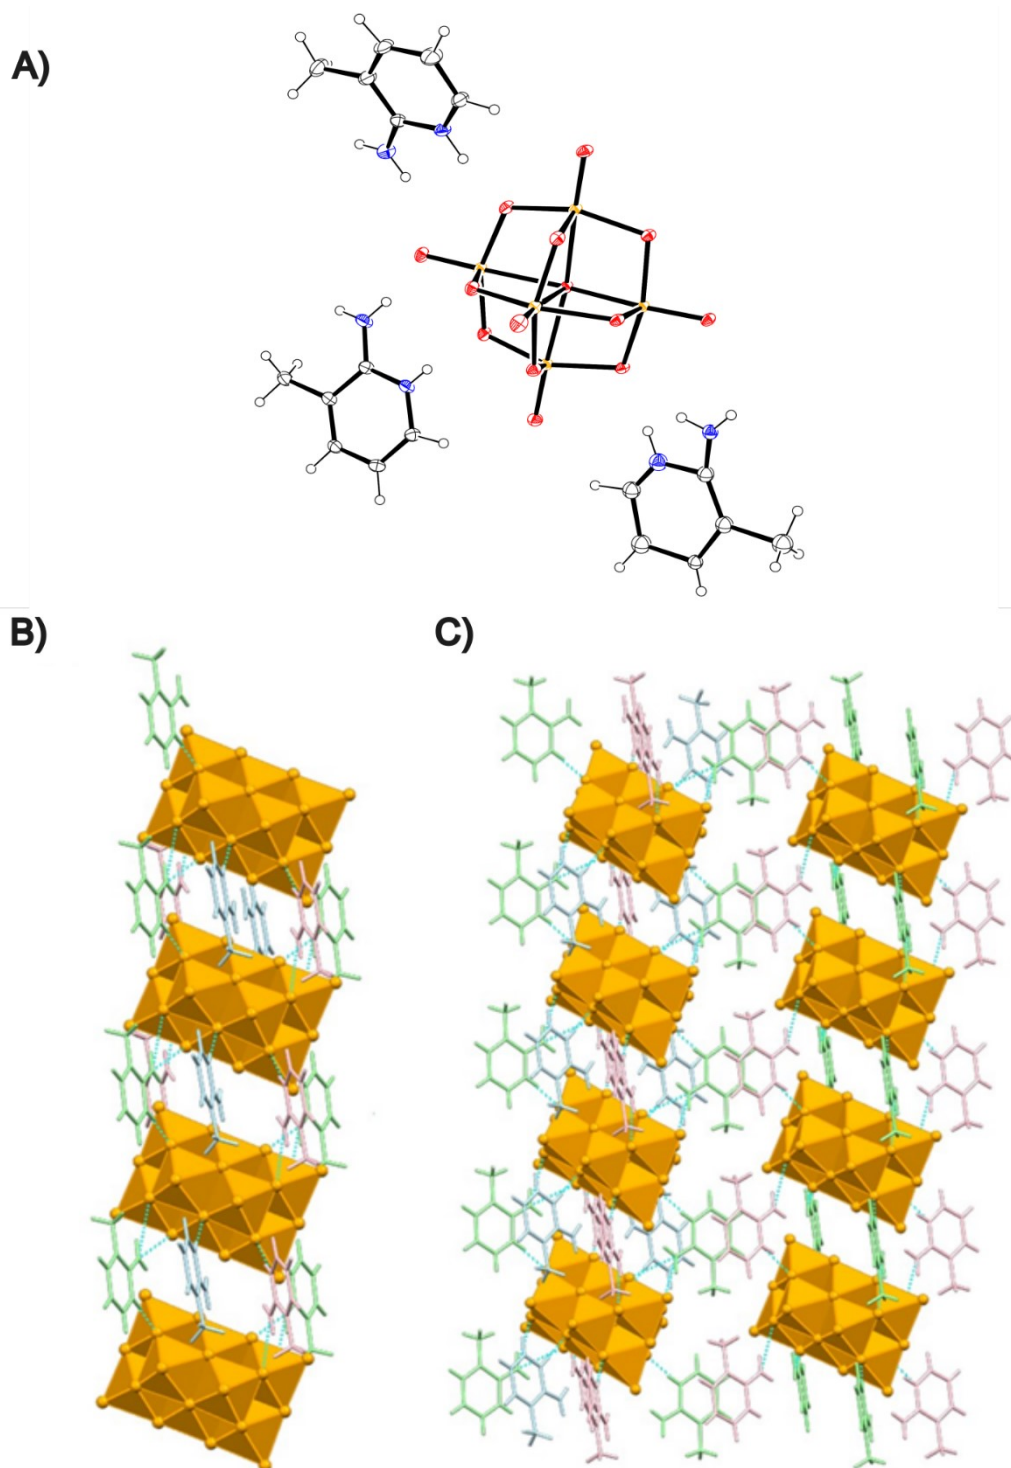

**Figure S2.** A) ORTEP view of the asymmetric unit of **2,3-ampV<sub>10</sub>**. Ellipsoid probability 35%, for the disordered 2-amino-3-methylpyridinium cation just the model with the bigger occupancy factor is reported. B) Chain formed by the 2,3-ampH<sup>+</sup> cation and V<sub>10</sub> anions interactions in **2,3-ampV<sub>10</sub>** (view along the *b* axis). C) 2,3-ampH<sup>+</sup> cation and V<sub>10</sub> anions network (view along the *b* axis). Color scheme: V = yellow, O = red, N = blue.



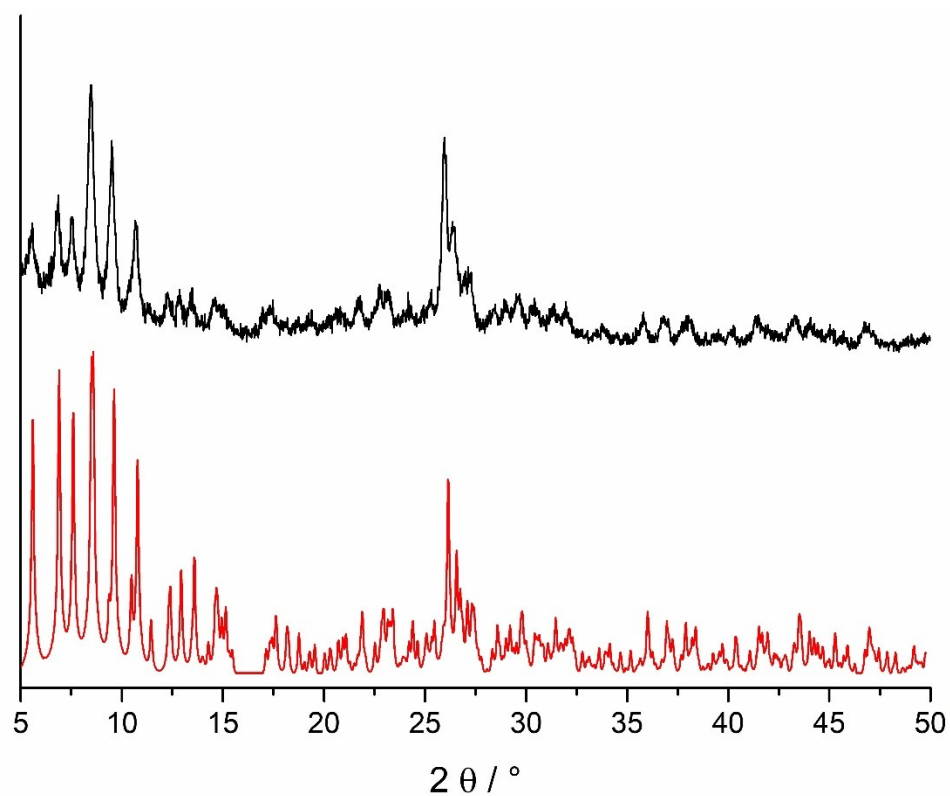

**Figure S3.** Calculated (red line) and experimental (black line) PXRD patterns of MBV<sub>10</sub>. Main peaks in the experimental diffractogram are located at 5.6, 6.9, 7.5, 8.5, 9.5, 10.6, 26, 26.4, and 27.1° in  $2\theta$ .

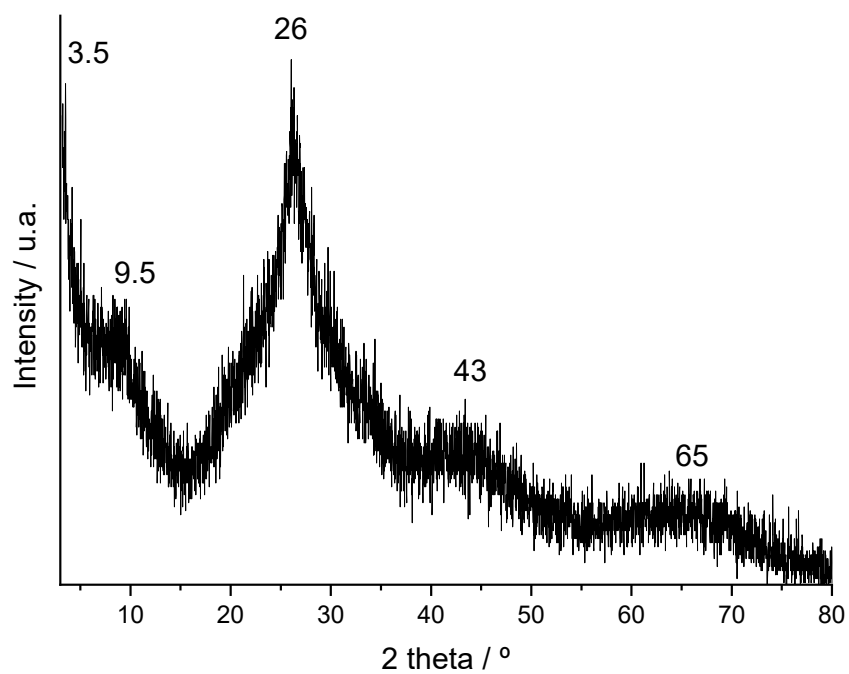

**Figure S4.** PXRD pattern of ATV<sub>10</sub>.

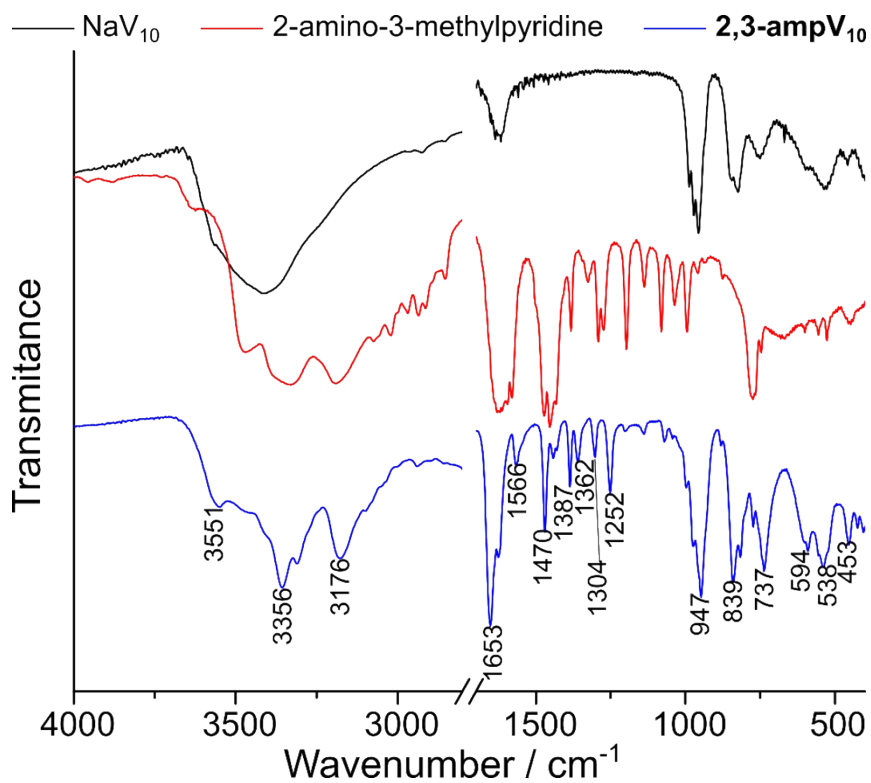

**Figure S5.** Infrared absorption spectrum of  $(2,3\text{-ampH})_6[\text{V}_{10}\text{O}_{28}] \cdot 4\text{H}_2\text{O}$  ( $2,3\text{-ampV}_{10}$ ) as compared to its starting materials.

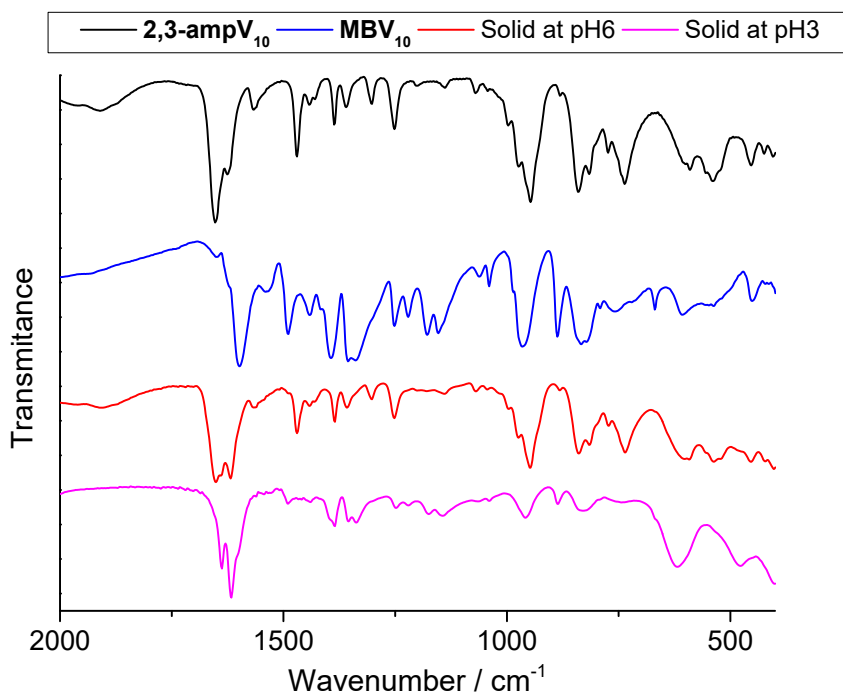

**Figure S6.** IR spectrum recorded for the remain solids isolated from MB bleaching reactions with  $2,3\text{-ampV}_{10}$ .

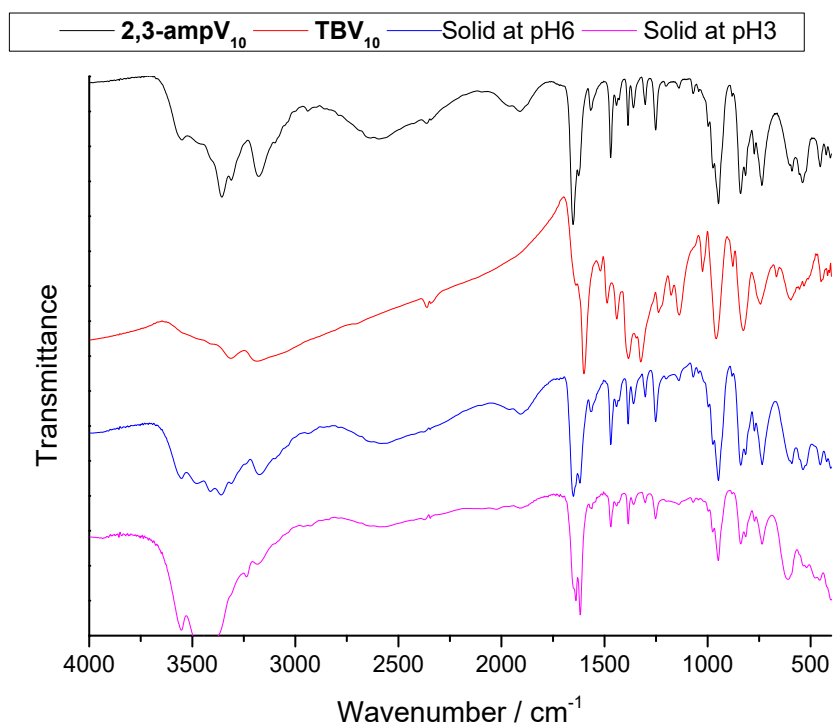

Figure S7. IR spectrum recorded for the solids isolated from TB bleaching reactions with **2,3-ampV<sub>10</sub>**.

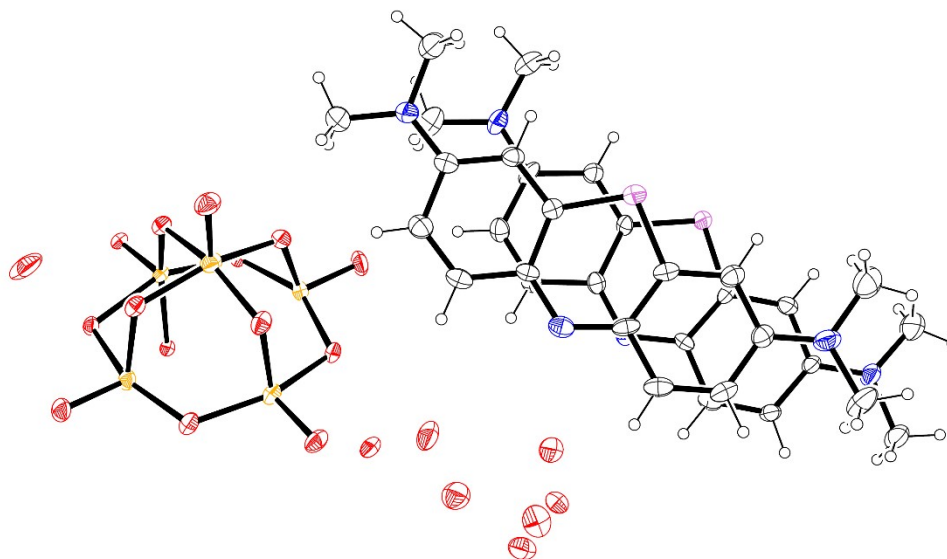

Figure S8. ORTEP view of the asymmetric unit of **MBV<sub>10</sub>**. Ellipsoid probability 30%. Color scheme: V = yellow, O = red, N = blue and S = purple.

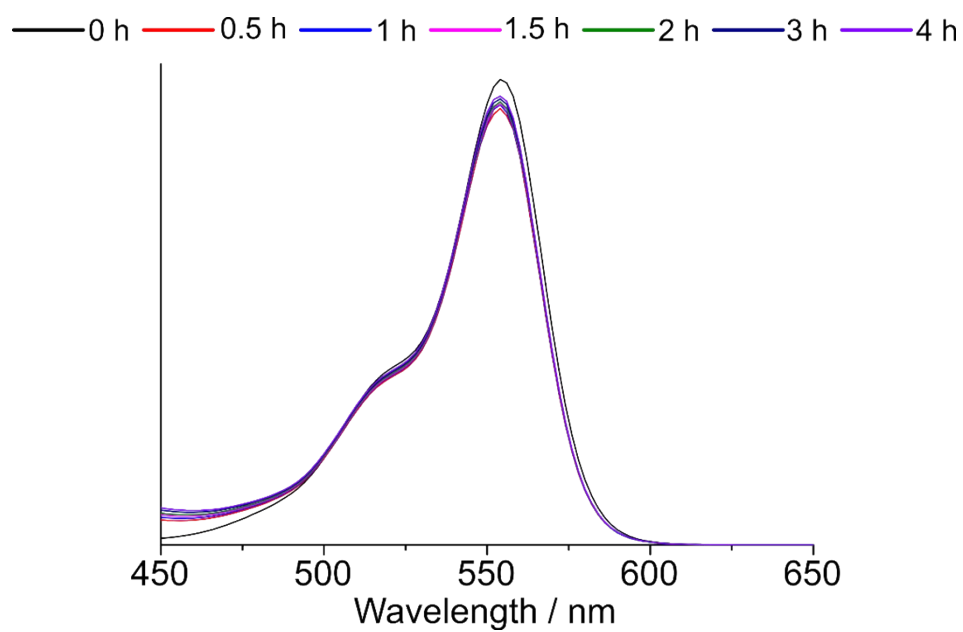

**Figure S9.** Electronic spectra registered for the supernatants of the bleaching reactions using 10 mg of **2,3-ampV<sub>10</sub>** in 10 mg L<sup>-1</sup> aqueous solution of RB in time.

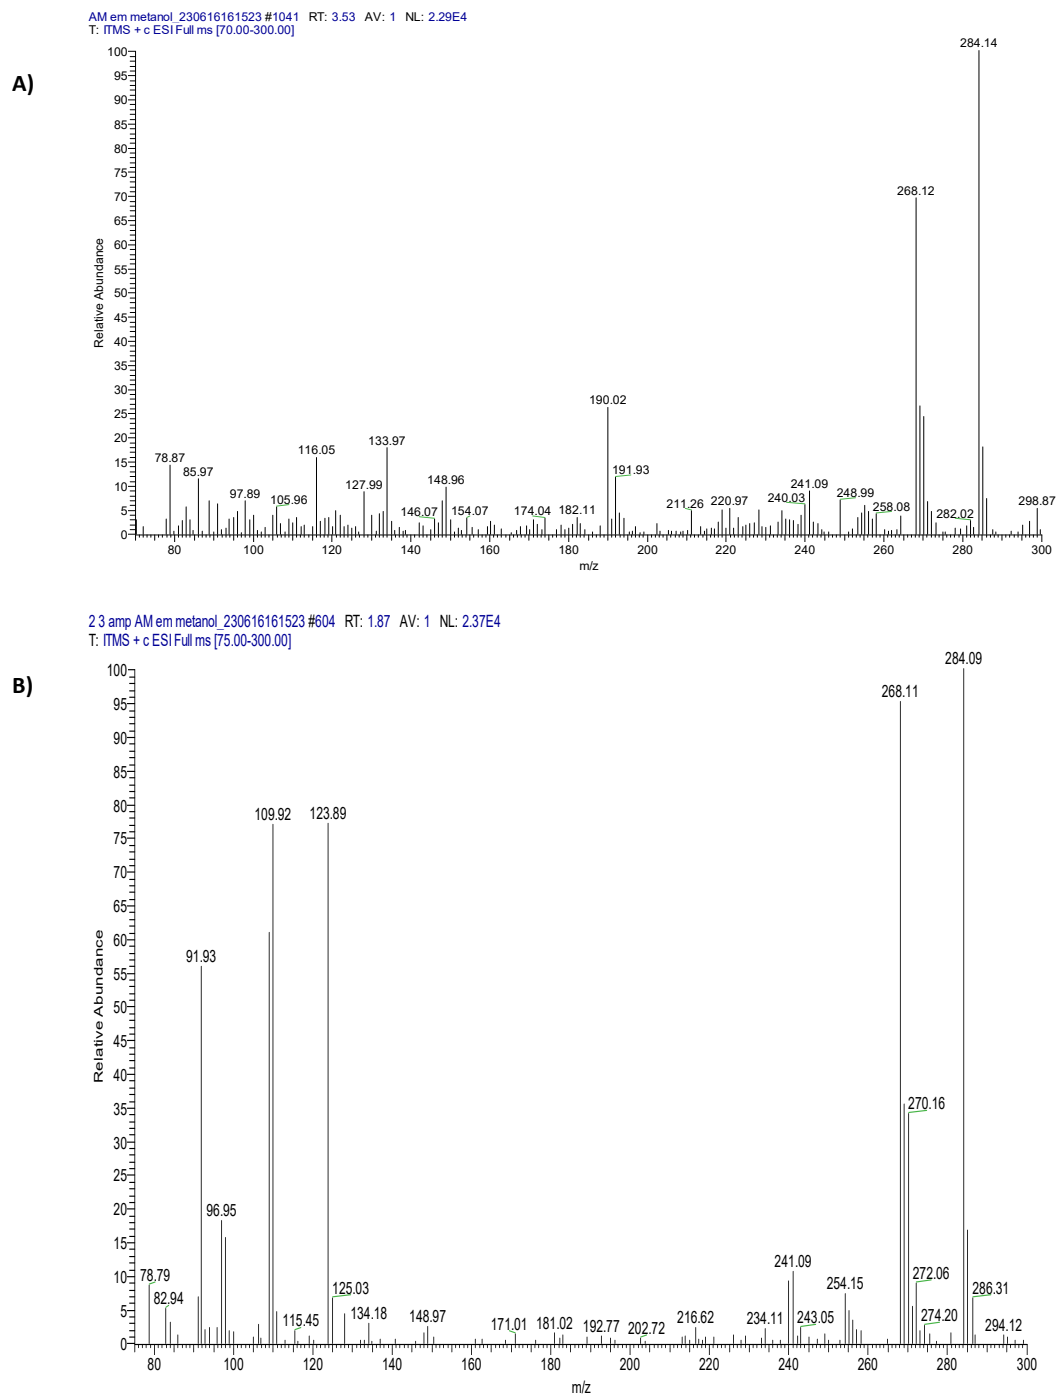

**Figure S10.** ESI-MS scan of MB ( $10 \text{ mg L}^{-1}$ ) in positive mode: **A)** before and **B)** after the reaction with  $10 \text{ mg}$  of **2,3-ampV<sub>10</sub>**.

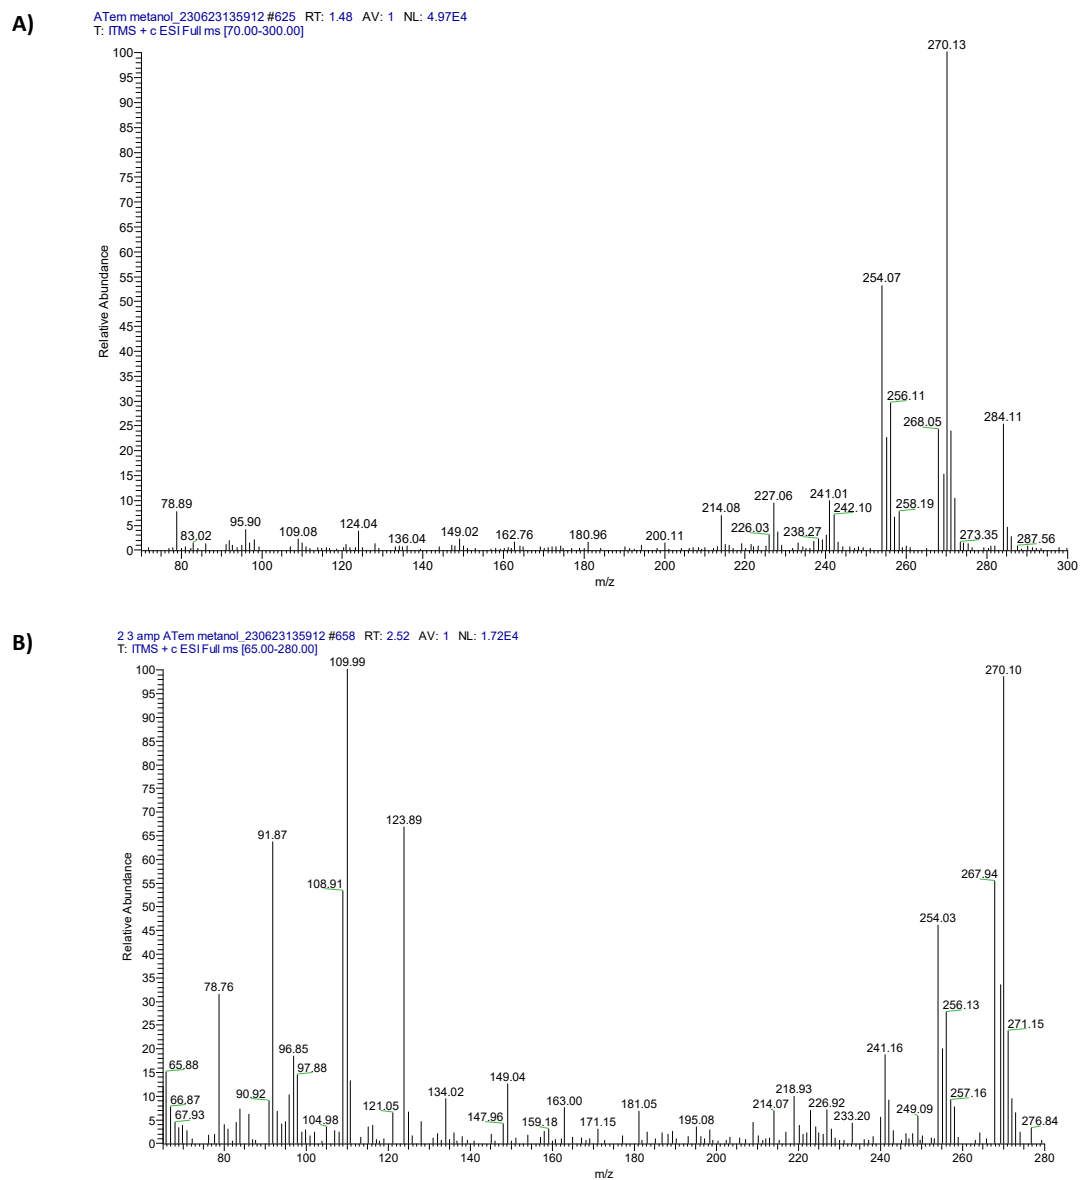

**Figure S11.** ESI-MS scan of TB ( $10 \text{ mg L}^{-1}$ ) in positive mode: **A)** before and **B)** after the reaction with  $10 \text{ mg 2,3-ampV}_{10}$ .

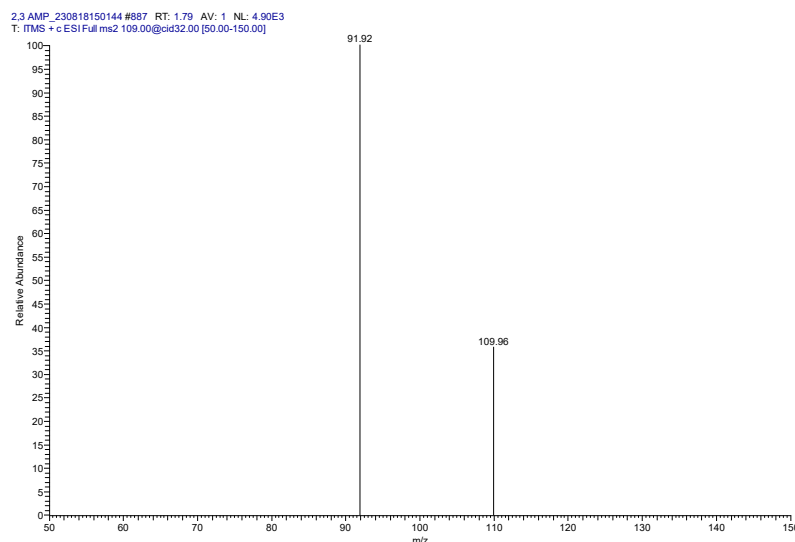

**Figure S12.** ESI-MS scan of 2-amino-3-methylpyridine in methanol in positive mode. The mass spectra showed peaks at  $m/z$  109.9 that corresponded to the protonated form of 2,3-ampH<sup>+</sup>. The peak at  $m/z$  91.9 may correspond to C<sub>6</sub>NH<sub>6</sub><sup>+</sup>.

#### References

1. H. Naslhajian, M. Amini, S. M. F. Farnia, A. Sheykhi, O. Şahin and O. Z. Yeşilel, *Journal of Coordination Chemistry*, 2017, **70**, 2940-2949.
2. C. Yuan, L. Lu, M. Zhu, Q. Ma and Y. Wu, *Acta Crystallographica Section E*, 2009, **65**, m267-m268.
3. Y. Gong, C. Hu, H. Li, W. Tang, K. Huang and W. Hou, *Journal of Molecular Structure*, 2006, **784**, 228-238.
4. L. Bartošová, Z. Padělková, E. Rakovský and P. Schwendt, *Polyhedron*, 2012, **31**, 565-569.
5. S. R. Amanchi and S. K. Das, *Frontiers in Chemistry*, 2018, **6**, 469.
6. A. S. Rao, T. Arumuganathan, V. Shivaiah and S. K. Das, *Journal of Chemical Sciences*, 2011, **123**, 229-239.
7. E. Sánchez-Lara, B. Martínez-Valencia, N. D. Corona-Motolinia, B. L. Sanchez-Gaytan, M. E. Castro, S. Bernès, M. A. Méndez-Rojas, F. J. Meléndez-Bustamante and E. González-Vergara, *New Journal of Chemistry*, 2019, **43**, 17746-17755.
8. B. Wu, X. Xu, K. Chen, Z. Xiao and P. Wu, 2015, *Zeitschrift für Kristallographie - New Crystal Structures*, **230**, 353-355.
9. E. Sánchez-Lara, A. Pérez-Benítez, S. Treviño, A. Mendoza, F. J. Meléndez, E. Sánchez-Mora, S. Bernès and E. González-Vergara, *Crystals*, 2016, **6**, 65.
10. E. Sánchez-Lara, I. Sánchez-Lombardo, A. Pérez-Benítez, Á. Mendoza, M. Flores-Álamo and E. G. Vergara, *Journal of Cluster Science*, 2015, **26**, 901-912.
11. R. Dridi, Z. Abdelkafi-Koubaa, N. Srairi-Abid, B. Socha and M. F. Zid, *Journal of Inorganic Biochemistry*, 2024, **255**, 112533.
12. R. L. Frost, K. L. Erickson, M. L. Weier and O. Carmody, *Spectrochimica Acta Part A: Molecular and Biomolecular Spectroscopy*, 2005, **61**, 829-834.
13. N. Sundaraganesan, C. Meganathan and M. Kurt, *Journal of Molecular Structure*, 2008, **891**, 284-291.
14. O. V. Ovchinnikov, A. V. Evtukhova, T. S. Kondratenko, M. S. Smirnov, V. Y. Khokhlov and O. V. Erina, *Vibrational Spectroscopy*, 2016, **86**, 181-189.
15. A. Belcaid, B. H. Beakou, S. Bouhsina and A. Anouar, *Biomass Conversion and Biorefinery*, 2024, **14**, 7783-7806.
16. K. Thenmozhi and S. Sriman Narayanan, *Analytical and bioanalytical chemistry*, 2007, **387**, 1075-1082.
17. M. A. Nasher, M. I. Youssif, N. A. El-Ghamaz and H. M. Zeyada, *Optik*, 2019, **178**, 532-543.
